# Supplementary material for: Effect of Pre-Harvest Supplemental UV-A/Blue and Red/Blue LED Lighting on Lettuce Growth and Nutritional Quality
Source: MDPI journal article supplement (doi:10.3390/horticulturae7040080), 2021-04-14
Supplement: s1 [file s1]

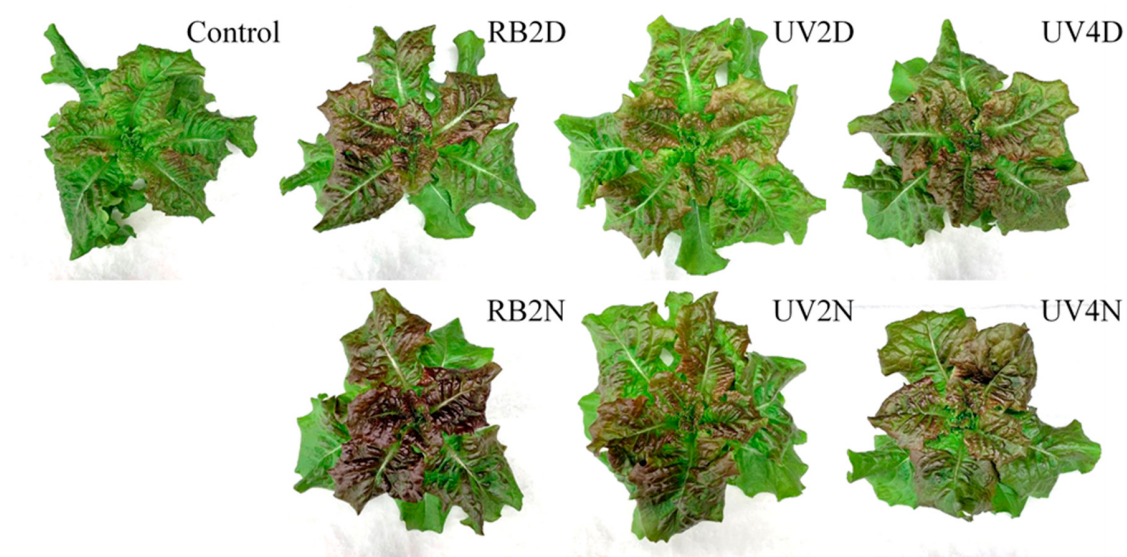

Supplemental Figure S1. Representative photos of the lettuce variety 'Red Mist' treated with supplemental UV-A/Blue (UV) or Red and Blue (RB) LED light for a duration of either two or four days (D) or nights (N) pre-harvest, in a greenhouse hydroponic system. The control plants did not receive any supplemental LED light. See Table 2 for additional treatment details.
